# Supplementary material
Source: publisher figshare collection journal article supplement (https://asha.figshare.com/articles/dataset/_/22329235)
Supplement: Supplementary file 1 [file 1]

## Sheet: 1- vs. 2-PL ability estimates
Supplemental material, Fergadiotis et al., "Item Response Theory Modeling of the Verb Naming Test," JSLHR, https://doi.org/10.1044/2023_JSLHR-22-00458
Supplemental Material S3. Ability estimates and their standard errors.
Participant ID	1-PL			2-PL
	theta	SE		theta	SE
ACWT01a	-0.044	0.301		-0.109	0.29
ACWT02a	0.817	0.323		1.005	0.339
ACWT08a	-2.014	0.512		-2.01	0.53
ACWT09a	0.803	0.322		0.804	0.311
ACWT10a	-0.614	0.324		-0.61	0.314
ACWT11a	-0.252	0.295		-0.321	0.289
ACWT12a	0.384	0.306		0.476	0.293
adler01a	0.242	0.305		0.182	0.288
adler02a	-0.601	0.322		-0.534	0.304
adler10a	-0.315	0.312		-0.405	0.304
adler20a	-0.313	0.304		-0.169	0.282
BU01a	1.333	0.353		1.356	0.374
BU07a	-0.776	0.335		-0.628	0.308
cmu03a	0.986	0.335		1.065	0.342
elman02a	-0.877	0.327		-0.986	0.343
elman06a	-1.312	0.396		-1.371	0.424
elman08a	-2.014	0.512		-2.01	0.53
elman10a	0.506	0.303		0.524	0.29
elman11a	0.673	0.308		0.754	0.306
elman12a	0.521	0.312		0.615	0.303
elman14a	-0.608	0.325		-0.676	0.323
fridriksson02a	1.142	0.343		1.132	0.343
fridriksson04a	1.249	0.336		1.033	0.312
fridriksson05a	1.346	0.364		1.245	0.357
fridriksson06a	-0.461	0.313		-0.441	0.301
fridriksson07a	1.541	0.385		1.571	0.417
fridriksson09a	0.083	0.3		0.135	0.284
fridriksson12a	0.099	0.305		0.014	0.288
fridriksson13a	-0.302	0.311		-0.317	0.301
kansas09a	-0.613	0.318		-0.68	0.318
kansas11a	1.156	0.338		1.256	0.362
kansas13a	0.227	0.297		0.141	0.284
kansas15a	0.224	0.295		0.295	0.283
kansas16a	-2.014	0.512		-2.01	0.53
kansas17a	-0.042	0.3		0.012	0.284
kansas23a	-1.117	0.361		-1.304	0.399
kempler02a	0.811	0.32		0.886	0.321
kempler03a	-0.169	0.303		-0.179	0.286
kempler04a	-0.312	0.311		-0.331	0.294
scale01a	-0.733	0.317		-0.842	0.328
scale04a	0.242	0.301		0.01	0.287
scale06a	0.244	0.304		0.299	0.29
scale08a	0.358	0.287		0.41	0.277
scale13a	-0.954	0.345		-0.945	0.343
scale20a	0.957	0.326		1.019	0.331
scale23a	0.506	0.301		0.377	0.28
scale24a	-2.014	0.512		-2.01	0.53
scale28a	-0.795	0.34		-0.712	0.325
scale30a	-0.748	0.32		-0.693	0.3
scale31a	-0.907	0.334		-0.998	0.345
scale33a	0.484	0.303		0.599	0.299
scale38a	-0.592	0.313		-0.65	0.313
STAR03a	-0.965	0.346		-0.876	0.333
TAP04a	0.983	0.333		1.02	0.335
TAP06a	-1.61	0.421		-1.503	0.408
TAP07a	-0.032	0.308		-0.036	0.294
TAP09a	-1.652	0.45		-1.663	0.467
TAP11a	-0.626	0.33		-0.586	0.318
TAP12a	-0.163	0.306		-0.046	0.284
TAP13a	-0.307	0.311		-0.404	0.305
TAP14a	-0.79	0.337		-0.82	0.335
TAP17a	-1.624	0.424		-1.602	0.434
TAP18a	0.141	0.295		0.147	0.274
TAP19a	-0.296	0.305		-0.142	0.277
TCU03a	-0.618	0.325		-0.731	0.327
TCU05a	1.803	0.448		1.789	0.479
TCU07a	-0.902	0.334		-0.879	0.326
TCU08a	-0.029	0.31		0.027	0.292
thompson02a	1.309	0.356		1.315	0.37
thompson04a	0.089	0.303		0.195	0.285
thompson05a	0.106	0.299		-0.014	0.284
thompson07a	1.827	0.423		1.824	0.46
thompson08a	1.593	0.399		1.65	0.44
thompson10a	1.367	0.371		1.514	0.416
thompson11a	-0.782	0.337		-0.775	0.331
thompson14a	1.099	0.327		0.812	0.292
tucson15a	-0.578	0.304		-0.613	0.297
tucson20a	-0.157	0.305		-0.142	0.287
tucson22a	-0.019	0.3		-0.139	0.289
whiteside01a	0.679	0.31		0.755	0.308
whiteside02a	-0.699	0.318		-0.768	0.314
whiteside06a	0.239	0.303		0.28	0.285
whiteside07a	1.168	0.351		1.105	0.344
whiteside09a	1.109	0.336		1.145	0.349
whiteside10a	-0.457	0.316		-0.492	0.306
whiteside12a	-0.773	0.333		-0.777	0.328
whiteside14a	0.107	0.311		0.128	0.292
whiteside15a	0.105	0.304		0.137	0.286
whiteside17a	1.039	0.317		1.175	0.343
williamson02a	1.346	0.364		1.41	0.393
williamson03a	-0.853	0.318		-0.836	0.31
williamson04a	0.218	0.293		0.133	0.277
williamson12a	-0.032	0.311		-0.112	0.298
williamson14a	0.248	0.31		0.326	0.293
williamson15a	0.203	0.292		0.217	0.274
williamson18a	0.82	0.321		0.727	0.303
williamson19a	-0.031	0.304		0.039	0.278
williamson21a	-1.635	0.427		-1.674	0.453
wozniak02a	1.015	0.336		0.791	0.31
wozniak03a	-0.175	0.308		-0.113	0.285
wozniak05a	0.112	0.309		0.179	0.291
wozniak07a	-0.312	0.311		-0.356	0.3
wright201a	0.107	0.3		-0.071	0.287
wright202a	1.123	0.332		1.064	0.327
wright203a	0.526	0.314		0.552	0.3
wright204a	0.384	0.308		0.456	0.294
wright206a	-0.574	0.31		-0.699	0.316
