# Supplementary material
Source: publisher figshare collection journal article supplement (https://asha.figshare.com/articles/dataset/_/22329235)

**Supplemental Material S2.** A parallel analysis plot.

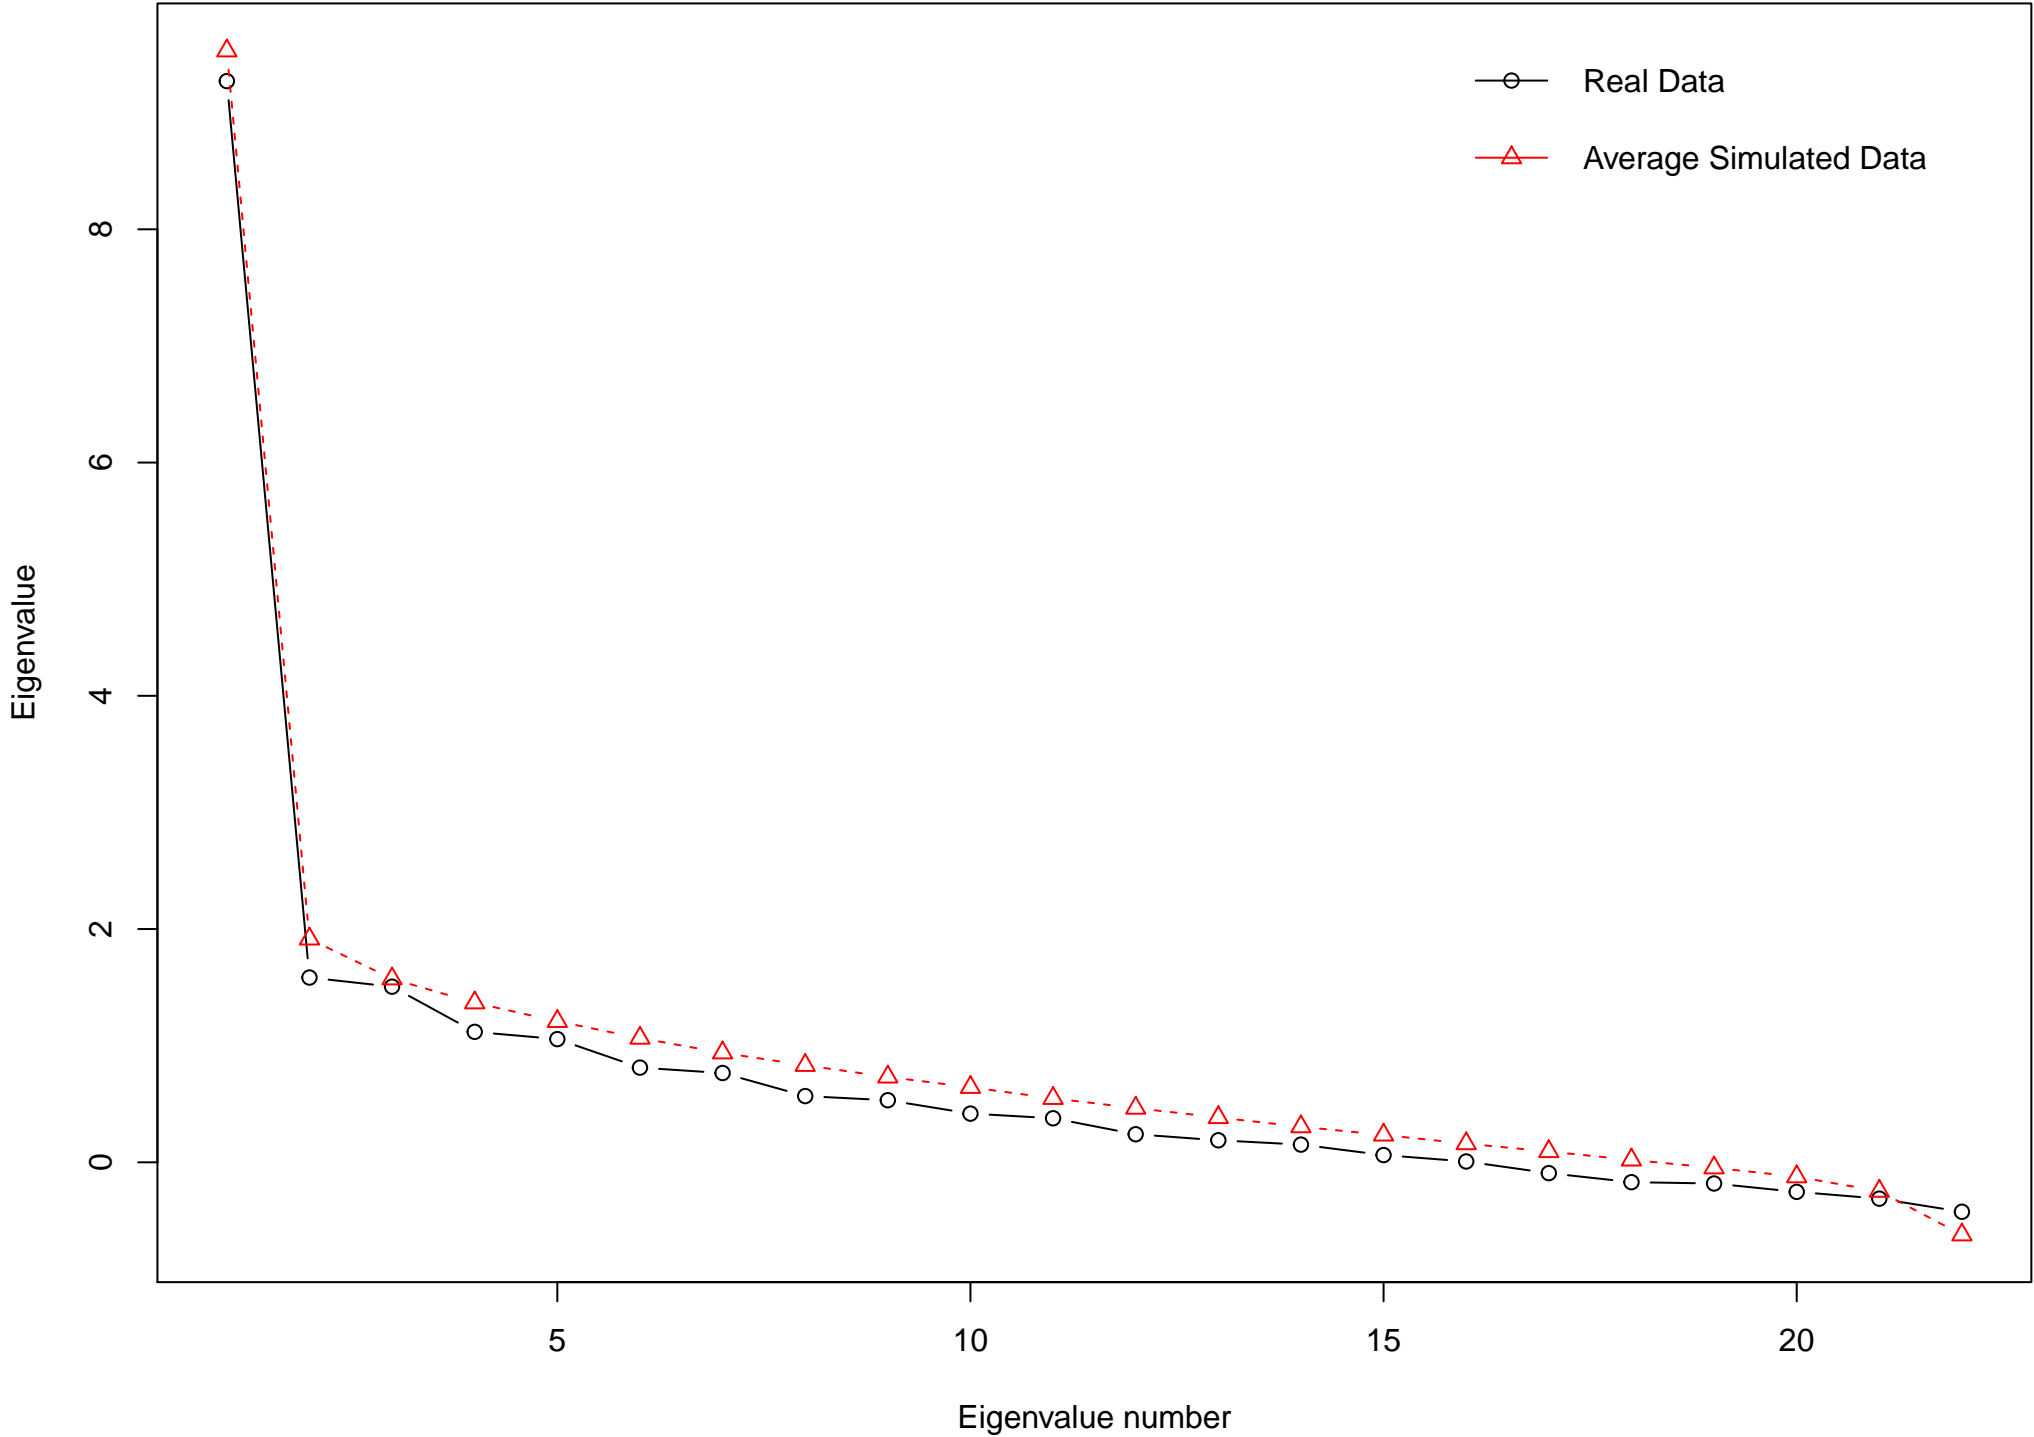

Supplement: Supplementary file 1 [file 1]
